# Supplementary material
Source: Frontiers journal article supplement (https://www.frontiersin.org/articles/302972)
Supplement: Data_Sheet_1.pdf [file Data_Sheet_1.pdf]

## APPENDIX A – CONCEPTS OF RETIREMENT PLANNING

Table APPENDIX A

*Summary Labels, Definitions, and Measurement Characteristics of Retirement Planning Identified from the Psychological Literature*

| Label                  | Definition or Description                                                                                                                                                                                                                                                                                                                                                                                                                                                                                                       | Source                             | Measurement Descriptives                                                                                                                                                                                                                                                | Sample Item                                                                                                                                                                                                                                                  |
|------------------------|---------------------------------------------------------------------------------------------------------------------------------------------------------------------------------------------------------------------------------------------------------------------------------------------------------------------------------------------------------------------------------------------------------------------------------------------------------------------------------------------------------------------------------|------------------------------------|-------------------------------------------------------------------------------------------------------------------------------------------------------------------------------------------------------------------------------------------------------------------------|--------------------------------------------------------------------------------------------------------------------------------------------------------------------------------------------------------------------------------------------------------------|
| retirement plans       | “...behavioral intentions about ret.” (p.140)                                                                                                                                                                                                                                                                                                                                                                                                                                                                                   | Ekerdt, DeViney, & Kosloski (1996) | Single-item self-report<br>Dummy-coded                                                                                                                                                                                                                                  | complete, partial, or never ret.;<br>serial-transition, uncertain                                                                                                                                                                                            |
| financial preparedness | “...an understanding of how much money would be needed to adequately meet ret. expenses and whether the appropriate computations had been made to ensure one would be financially solvent during postemployment period” (p.691)                                                                                                                                                                                                                                                                                                 | Hershey & Mowen (2000)             | 4-item self-report 7-point<br>Likert-type<br>(1) Strongly disagree – (7)<br>Strongly agree                                                                                                                                                                              | I know how much money I (we) will need to comfortably retire.                                                                                                                                                                                                |
| retirement planning    | “...a cluster of loosely related cognitions and behaviors that are partially substitutable and individually represent the construct to some unknown and varying degree...at simplest level...can be represented as an intention to the form ret. will take...most direct measure is anticipatory rehearsal. That is, to what extent are workers thinking about ret. and discussing it with their friends and coworkers...such activities serve as an anchor by which to evaluate and add meaning to the other measures” (p.162) | Kosloski, Ekerdt, & DeViney (2001) | Mixed-format:<br><i>Intention</i> : Single dummy-coded variable.<br><br><i>Subjective probability</i> :<br>2-items, from 1 (no chance) to 10 (certainty).<br><br><i>Anticipatory Rehearsal</i> : 2-item self-report<br>4-point Likert-type<br>(a lot) – (hardly at all) | stop work altogether, work fewer hours, change kind of work, never stop working, no plans<br><br>Chances you’ll be working full-time after reaching age 62 / 65<br><br>How much have you thought about ret. / discussed ret. with your friends or coworkers? |

|                                         |                                                                                                                                                                                                                                |                                                    |                                                                                                                                                                                                                                                                                                                                                                                                           |                                                                                                                                             |
|-----------------------------------------|--------------------------------------------------------------------------------------------------------------------------------------------------------------------------------------------------------------------------------|----------------------------------------------------|-----------------------------------------------------------------------------------------------------------------------------------------------------------------------------------------------------------------------------------------------------------------------------------------------------------------------------------------------------------------------------------------------------------|---------------------------------------------------------------------------------------------------------------------------------------------|
| retirement anticipation and preparation | Multifaceted: “Anticipation and preparation for ret. variables included proximity to ret., ret. fund calculation, ret. savings amount, confidence in government program, and workplace financial education and advice” (p.81). | Kim, Kwon, & Anderson (2005)                       | Mixed-format:<br><i>Proximity</i> : difference between employer or work-related retirement age and expected ret. <i>Ret. Fund Calculation</i> : Y/N<br><i>Savings Amount</i> : dummy-coded with prescribed ranges<br><i>Confidence in government program</i> : 2-item self-report 4-point Likert-type (Not at all confident) – (Very confident).<br><i>Workplace financial education and advice</i> : Y/N | In the past 12 months, has an plan provider given you educational material, information, or seminars about retirement planning and savings? |
| retirement planning                     | “Having thought about ret.” (p.216).                                                                                                                                                                                           | Lusardi & Mitchell (2007)                          | Single-item self-report; 4-point Likert-type (A lot) – (Hardly at all)                                                                                                                                                                                                                                                                                                                                    | How much have you thought about RePlanning?                                                                                                 |
| retirement planning activity level      | “...the frequency of both information seeking and instrumental planning activities that had occurred in the past 12 months” (p.31).                                                                                            | Hershey, Jacobs-Lawson, McArdle, & Hamagami (2007) | 10-item self-report; 7-point Likert-type (Strongly disagree) - (Strongly agree)                                                                                                                                                                                                                                                                                                                           | Frequently read articles/brochures on investing or financial planning.                                                                      |
| financial planning activities           | “...span a wide range of behaviors. One class of behaviors involves information-seeking activities” and “...instrumental behaviors”.                                                                                           | Stawski, Hershey, Jacobs-Lawson (2007)             | 9-item self-report; 7-point Likert-type (Strongly Disagree) – (Strongly Agree)                                                                                                                                                                                                                                                                                                                            | Assessed your net worth.                                                                                                                    |
| retirement plans                        | “at what age they planned to permanently stop working with the organization”                                                                                                                                                   | Luchak, Pohler, & Gellatly (2008)                  | Open-item, self-report                                                                                                                                                                                                                                                                                                                                                                                    | At what age do you plan to stop work completely from your current organization?                                                             |
| retirement planning                     | Multi-domain goals and behaviors, “in preparation for retirement” (p.249)                                                                                                                                                      | Petkoska & Earl (2009)                             | 36-item self-report Y/N                                                                                                                                                                                                                                                                                                                                                                                   | Made new friends recently                                                                                                                   |

|                                     |                                                                                                                                                               |                                  |                                                                                                                                                                                     |                                                                                                                                                                                                                                                                                                                |
|-------------------------------------|---------------------------------------------------------------------------------------------------------------------------------------------------------------|----------------------------------|-------------------------------------------------------------------------------------------------------------------------------------------------------------------------------------|----------------------------------------------------------------------------------------------------------------------------------------------------------------------------------------------------------------------------------------------------------------------------------------------------------------|
| Retirement planning tendencies      | "active involvement in investment, regular saving, reviewing investment performance, using several sources of investment info"                                | Hira, Rock, & Loibl (2009)       | 8 behavioral variables analyzed separately. 6 on 5-point Likert-type scale (1) Strongly disagree - (5) Strongly agree. 1 on 5-point Likert-type scale (1) Hardly - (5) Often. 1 Y/N | Review and compare investment performance                                                                                                                                                                                                                                                                      |
| Retirement preparation              | "...effort invested by individuals, while still employed, to provide for their well-being in ret." (p.99).                                                    | Muratore & Earl (2010)           | 28-item self-report; 5-point Likert-type (Very small amount of effort) – (Very large amount of effort)                                                                              | <i>Public Protection</i> - Applying for a seniors concession allowance<br><i>Self-insurance</i> - Checking your superannuation fund's performance<br><i>Self-protection</i> – Participating in one or more leisure planning or wellbeing workshops, seminars, or courses on ret. which were not government-run |
| Retirement planning <sup>b</sup>    | "...goal-directed thoughts and behaviors that promote good health and provide financial security, fulfilling lifestyles, and rewarding roles in ret." (p.522) | Noone, Stephens, & Alpass (2010) | 2-6-item self-report <sup>c</sup> 5-point Likert-type (Definitely not true of me) – (Definitely true of me)                                                                         | It is likely that I will own a home w/o a mortgage in ret.                                                                                                                                                                                                                                                     |
| Retirement proactivity <sup>a</sup> | "general proactive planning for ret....such as active exploration, planning, and monitoring" (p.108)                                                          | Griffin, Loe, & Hesketh (2012)   | 11-item self-report; 5-point Likert-type (Not at all) – (A great deal)                                                                                                              | Develop knowledge and skills to help you cope well with ret.                                                                                                                                                                                                                                                   |
| Retirement preparation              | "...the extent to which participants were engaged in preparing for their ret., including financial and non-financial planning" (p.132).                       | Griffin, Loe, & Hesketh (2012)   | 15-item self-report; 5-point Likert-type (Not at all) – (A great deal)                                                                                                              | Actively seeking professional financial advice                                                                                                                                                                                                                                                                 |

Notes. <sup>a</sup> items adapted from existing measure, <sup>b</sup> item-length varies across planning domains. Ret. = retire/ment. RePlanning = retirement planning, RePrep = retirement preparation. Entries listed in publication-chronological order.

## APPENDIX B – SYSTEMATIC-KEYWORD SEARCH PROTOCOL

Summary Boolean Search-Term Protocol for Identifying and Extracting Empirical Literature

| Database                                       | Boolean Search Terms (in <b>title</b> or <b>abstract</b> )                                          | 1986 - 1995 | 1996–2005 | 2006-2016 |
|------------------------------------------------|-----------------------------------------------------------------------------------------------------|-------------|-----------|-----------|
| ProQuest<br>PsycARTICLES<br>&<br>Dissertations | “Retire*” AND (plan* OR prep* OR saving*) AND (antecedent* OR determinant* OR cause* OR predictor*) | 150         | 135       | 188       |
| Medline                                        | “Retire*” AND (plan* OR prep* OR saving*) AND (antecedent* OR determinant* OR cause* OR predictor*) | 14          | 52        | 99        |
| JSTOR                                          | “Retire*” AND (plan* OR prep* OR saving*) AND (antecedent* OR determinant* OR cause* OR predictor*) | 12          | 15        | 9         |
| ERIC                                           | “Retire*” AND (plan* OR prep* OR saving*) AND (antecedent* OR determinant* OR cause* OR predictor*) | 7           | 8         | 21        |

| Database                                       | Boolean Search Terms (in <b>title</b> or <b>abstract</b> )                                     | 1986–1995 | 1996–2005 | 2006-2016 |
|------------------------------------------------|------------------------------------------------------------------------------------------------|-----------|-----------|-----------|
| ProQuest<br>PsycARTICLES<br>&<br>Dissertations | “Retire*” AND (plan* OR prep* OR saving*) AND (outcome* OR result* OR consequence* OR effect*) | 150       | 236       | 349       |
| Medline                                        | “Retire*” AND (plan* OR prep* OR saving*) AND (outcome* OR result* OR consequence* OR effect*) | 41        | 85        | 222       |
| JSTOR                                          | “Retire*” AND (plan* OR prep* OR saving*) AND (outcome* OR result* OR consequen* OR effect*)   | 18        | 36        | 26        |
| ERIC                                           | “Retire*” AND (plan* OR prep* OR saving*) AND (outcome* OR result* OR consequence* OR effect*) | 8         | 9         | 49        |

## APPENDIX C – DEMOGRAPHIC ANTECEDENTS OF RETIREMENT PLANNING

### APPENDIX C

#### *Summary Study Descriptives and Effect Sizes for Demographic Antecedents of Retirement Planning*

| Study                             | Antecedent | Outcome                | Sample                       | Design | ES ( <i> r </i> )                   |
|-----------------------------------|------------|------------------------|------------------------------|--------|-------------------------------------|
| Lusardi et al. (2001, 2006, 2007) | Wealth     | retirement planning    | HRS; Rand ALP                | X      | (.07, .37)                          |
| Topa et al. (2009)                | Wealth     | retirement planning    | Multisource                  | MA     | .29 <sup>a</sup> ; .37 <sup>b</sup> |
| Dwyer & Mitchell (1999)           | Health     | expected retirement    | HRS                          | X      | .15                                 |
| Benitez-Silva and Dwyer (2002)    | Health     | thoughts of retirement | HRS                          | L      | .12                                 |
| Topa et al. (2009)                | Health     | retirement planning    | Primary studies              | MA     | .05                                 |
| EBRI (2015)                       | Gender     | formal retirement plan | US census data               | X      | .24                                 |
| Montalto, Yuh, and Hanna (2000)   | Race       | expected retirement    | Survey of Consumer Finances  | X      | .21                                 |
| Stawski et al (2007)              | Age        | planning behavior      |                              | X      | .32                                 |
|                                   |            | retirement savings     | US public convenience sample | X      | .26                                 |

*Note.* Values in parentheses indicate range of effect sizes across primary studies. X = cross-sectional, L = longitudinal, MA = meta-analysis. HRS = U.S. Health and Retirement Study, ALP = American Life Panel. EBRI = Employee Benefits Research Institute. <sup>a</sup>Objective indicators, <sup>b</sup>Subjective indicators.

## APPENDIX D – SITUATIONAL ANTECEDENTS OF RETIREMENT PLANNING

### APPENDIX D

*Summary Study Descriptives and Effect Sizes for Situational Antecedents of Retirement Planning by Job Characteristic and Interpersonal Domains*

| <i>Job Characteristic</i> |                             |                                |                                   |        |             |
|---------------------------|-----------------------------|--------------------------------|-----------------------------------|--------|-------------|
| Study                     | Antecedent                  | Outcome                        | Sample (N) [Age Range]            | Design | ES <i>r</i> |
| Kosloski et al<br>(2001)  | Intrinsic Job Reward        | Retirement planning composite  | US national rep (3,936) [51 – 62] | X      | .21         |
|                           | Social Relations at Work    | Retirement planning composite  | US national rep (3,936) [51 – 62] | X      | .18         |
|                           | Ascendancy Opportunity      | Retirement planning composite  | US national rep (3,396) [51 – 62] | X      | .08         |
| Taylor & Shore<br>(1995)  | Org-filled retirement needs | Retirement financial concerns  | US Firm employees (303) [19 – 71] | X      | .27         |
|                           | Org-filled retirement needs | Social retirement expectations | US Firm employees (303) [19 – 71] | X      | .31         |
|                           | Organization commitment     | Planned retirement age         | US Firm employees (303) [19 – 71] | X      | .22         |
|                           | Organization commitment     | Retirement financial concerns  | US Firm employees (303) [19 – 71] | X      | .32         |

|                      |                             |                                 |                                   |   |     |
|----------------------|-----------------------------|---------------------------------|-----------------------------------|---|-----|
|                      | Organization commitment     | Retirement social expectations  | US Firm employees (303) [19 – 71] | X | .36 |
|                      | Organization commitment     | Retirement leisure expectations | US Firm employees (303) [19 – 71] | X | .12 |
|                      | Job satisfaction            | Planned retirement age          | US Firm employees (303) [19 – 71] | X | .20 |
|                      | Job satisfaction            | Retirement financial concerns   | US Firm employees (303) [19 – 71] | X | .28 |
|                      | Job satisfaction            | Expected retirement adjustment  | US Firm employees (303) [19 – 71] | X | .04 |
|                      | Job satisfaction            | Retirement social expectations  | US Firm employees (303) [19 – 71] | X | .42 |
|                      | Pay satisfaction            | Planned retirement age          | US Firm employees (303) [19 – 71] | X | .01 |
|                      | Pay satisfaction            | Retirement financial concerns   | US Firm employees (303) [19 – 71] | X | .22 |
|                      | Pay satisfaction            | Retirement social expectations  | US firm employees (303) [19 – 71] | X | .31 |
|                      | Pay satisfaction            | Retirement leisure expectations | US firm employees (303) [19 – 71] | X | .12 |
| van Dam et al (2009) | Future manageable workloads | Early retirement intentions     | Dutch full-time employees         | X | .18 |

|                            |                                                    |                               | (346) [50-65]                                |        |             |
|----------------------------|----------------------------------------------------|-------------------------------|----------------------------------------------|--------|-------------|
|                            | Future quality work tasks                          | Early retirement intentions   | Dutch full-time employees                    | X      | .44         |
|                            |                                                    |                               | (346) [50-65]                                |        |             |
| Topa et al.                | Negative work conditions                           | Retirement planning           | K = 2 (1038)                                 | MA     | .15         |
| (2009)                     | Work involvement                                   | Retirement planning           | K = 4 (4,451)                                | MA     | .31         |
|                            | Job satisfaction                                   | Retirement planning           | K = 6 (2,216)                                | MA     | .34         |
| <i>Interpersonal</i>       |                                                    |                               |                                              |        |             |
| Study                      | Antecedent                                         | Outcome                       | Sample (N) [Age Range]                       | Design | ES <i>r</i> |
| Ekerdt et al (1996)        | Married                                            | Plans for retirement          | US national rep (5,072) [51-61]              | X      | .13         |
| Kosloski et al.<br>(2001)  | Married                                            | Earlier planned retirement    | US national rep (4,147) [51 – 62]            | X      | .16         |
|                            | Married                                            | Thoughts about retirement     | US national rep (4,147) [51 – 62]            | X      | .18         |
| Elders & Rudolph<br>(1999) | Married                                            | Attended a retirement seminar | US retirees (1,781) [51 – 62]                | X      | .25         |
| vanRooij et al<br>(2012)   | Married                                            | Retirement plan adherence     | Dutch heads of households (1,091)<br>[22-90] | X      | .05         |
|                            | Observe worse financial<br>status of older sibling | Thoughts about retirement     | US national rep<br>(4,147) [51 -61]          | X      | .12         |
| Lusardi (2003)             | Observe parents in nursing<br>home                 | Thoughts about retirement     | US national rep<br>(4,147) [51 -61]          | X      | .17         |



|                          |                                                      |                                                  |                                                           |                                     |     |
|--------------------------|------------------------------------------------------|--------------------------------------------------|-----------------------------------------------------------|-------------------------------------|-----|
|                          | Observe parents with terminal illness                | Thoughts about retirement                        | US national rep<br>(4,147) [51 -61]                       | X                                   | .16 |
| Chalmers et al<br>(2008) | Average proximity of peer retirement                 | Decision to retire                               | Oregon public sector employees<br>(71,923) [58 – 62]      | L                                   | .31 |
| Duflo & Saez<br>(2002)   | Average within-department participation              | Employer-sponsored retirement plan participation | Public university staff and faculty<br>(11,360) [20 – 64] | X                                   | .31 |
|                          | Monetary incentive for attending benefits fair (1-F) | Retirement plan enrollment                       | Public university staff<br>(6,200) [20-59]                | RCT<br>2-<br>Fact<br>or<br>(nested) | .19 |
| Duflo & Saez<br>(2003)   | Monetary incentive for attending benefits fair (2-F) | Retirement plan enrollment                       | Public university staff<br>(6,200) [20-59]                | RCT<br>2-<br>Fact<br>or<br>(nested) | .12 |

*Note.* Entries listed in chronological order. X=cross-sectional design, RCT = Randomized Control Trial, MA=meta-analysis.
